# Supplementary material for: The role of angiogenesis in Group 3 medulloblastoma pathogenesis and survival
Source: Oxford University Press journal article supplement (doi:10.1093/neuonc/nox033), 2017-02-17
Supplement: nox033_suppl_Supplementary_Table_1.docx [file nox033_suppl_Supplementary_Table_1.docx]

| **Supplementary Table 1. MRI Sequences and Parameters** | | |  |  |  |  |  |  |  |
| --- | --- | --- | --- | --- | --- | --- | --- | --- | --- |
|  | TR/TE (ms) | FOV$ (cm2) | Slice Thickness (mm) | Number of Slices | Matrix Size | Averages | Flip Angle | RARE† Factor | Temporal Resolution (s) |
| Axial T2-weighted RARE | 4200/36 | 3.2 x 3.2 | 1.5 | 15 | 128 x 128 | 1 | NA | 8 |  |
| Axial T1-weighted FLASH | 120/3 | 3.2 x 3.2 | 1.5 | 15 | 128 x 128 | 8 | 40 |  |  |
| Axial T2* FLASH | 600/9 | 3.2 x 3.2 | 1.5 | 15 | 128 x 128 | 2 | 40 |  |  |
| Map Saturation-Recovery RARE | 300, 750, 1500, 3000, 6000, 12000/9.6 | 3.2 x 3.2 | 1.5 | 3 | 128 x 128 |  |  | 4 |  |
| DSC MRI (T2*) | 31/5 | 3.2 x 3.2 | 1.5 | 3 | 64 x 64 | 1 | 6 |  | 2 |
| DCE MRI | 25/2.3 | 3.2 x 3.2 | 1.5 | 3 | 64 x 128 | 1 | 20 |  | 1.6 |
| Axial T1-weighted FLASH | 120/3 | 3.2 x 3.2 | 1.5 | 15 | 128 x 128 | 8 | 40 |  |  |
| SWI | 600/9.5 | 3.2 x 3.2 | 1.5 | 10 | 512 x 512 | 8 | 40 |  |  |
|  |  |  |  |  |  |  |  |  |  |
| Order of sequences in this table was the order in which they were acquired. | | | |  |  |  |  |  |  |
| †Rapid Acquisition with Refocused Echoes | |  |  |  |  |  |  |  |  |
| $Field of View |  |  |  |  |  |  |  |  |  |
