# Supplementary material for: The role of angiogenesis in Group 3 medulloblastoma pathogenesis and survival
Source: Oxford University Press journal article supplement (doi:10.1093/neuonc/nox033), 2017-02-17
Supplement: nox033_suppl_Supplementary_Table_2.docx [file nox033_suppl_Supplementary_Table_2.docx]

**Supplementary Table 2. DCE MRI Data by Xenograft Type**

|  | **D283** | **D341** | **D425** |
| --- | --- | --- | --- |
| Ktrans mean ± SD | 0.084 ± 0.04 | 0.052 ± 0.045 | 0.05 ± 0.031 |
| ve mean ± SD | 0.119 ± 0.109 | 0.067 ± 0.032 | 0.033 ± 0.015 |

DCE = Dynamic Contrast Enhanced, Ktrans = transfer coefficient, ve = extravascular extracelluar volume fraction
