# Supplementary material for: The role of angiogenesis in Group 3 medulloblastoma pathogenesis and survival
Source: Oxford University Press journal article supplement (doi:10.1093/neuonc/nox033), 2017-02-17
Supplement: nox033_suppl_Supplementary_Table_3.docx [file nox033_suppl_Supplementary_Table_3.docx]

**Supplementary Table 3.Putative drivers of Group 3 medulloblastoma angiogenesis.**

| **Gene** | **Location** | **Alternative Names** | **Role in Angiogenesis** |
| --- | --- | --- | --- |
| *RNH1*[1] | 11p15.5 | *RAI; RNH* | Regulation of angiogenin. |
| *SCG2*[2, 3] | 2q35-36 | *SN; CHGC; EM66; SgII* | Proliferation and antiapoptotic effects of endothelial cells. |
| *VEGFA*[4] | 6p12 | *VPF; VEGF; MVCD1* | Growth factor for proliferation and migration of endothelial cells and vessel permeability |
| *AGGF1*[5] | 5q13.3 | *VG5Q; GPATC7; GPATCH7; HSU84971; HUS84971* | Endothelial cell proliferation. |
| *PROK2*[6, 7] | 3p13 | *BV8; HH4; PK2; KAL4; MIT1* | Induces proliferation, migration, and survival of endothelial cells. |

**References**

1. NCBI. *RNH1 ribonuclease/angiogenin inhibitor*. 2016; Available from: http://www.ncbi.nlm.nih.gov/gene/6050.

2. NCBI. *SCG2 secretogranin II*. 2016; Available from: http://www.ncbi.nlm.nih.gov/gene/7857.

3. Kirchmair, R., et al., *The neuropeptide secretoneurin acts as a direct angiogenic cytokine in vitro and in vivo.* Circulation, 2004. **109**(6): p. 777-83.

4. NCBI. *VEGFA vascular endothelial growth factor A*. 2016 9/22/16]; Available from: http://www.ncbi.nlm.nih.gov/gene/7422.

5. NCBI. *AGGF1 angiogenic factor with G-patch and FHA domains 1*. 2016; Available from: http://www.ncbi.nlm.nih.gov/gene/55109.

6. NCBI. *PROK2 prokineticin 2*. 2016; Available from: http://www.ncbi.nlm.nih.gov/gene/60675.

7. LeCouter, J., et al., *Bv8 and endocrine gland-derived vascular endothelial growth factor stimulate hematopoiesis and hematopoietic cell mobilization.* Proc Natl Acad Sci U S A, 2004. **101**(48): p. 16813-8.
